# Supplementary material for: Evaluation of a GDNF-eluting nanofibrous PCL conduit in a mouse model of peripheral nerve injury
Source: Royal Society of Chemistry journal article supplement (doi:10.1039/d6ra03291e), 2026-05-05
Supplement: d6ra03291e2.pdf [file d6ra03291e2.pdf]

## Supplementary material

**Supplementary table 1. Mean YFP+ and TUBB3+ axon counts from different positions within nerve repair constructs.**

| Segment         | Mean axon count ( $\pm$ SD) |                 |               |                 |               |                 |
|-----------------|-----------------------------|-----------------|---------------|-----------------|---------------|-----------------|
|                 | Graft                       | Graft           | PCL           | PCL             | PCL+GDNF      | PCL+GDNF        |
|                 | YFP                         | TUBB3           | YFP           | TUBB3           | YFP           | TUBB3           |
| <i>Proximal</i> | 145 $\pm$ 60                | 1929 $\pm$ 587  | 133 $\pm$ 47  | 2065 $\pm$ 995  | 153 $\pm$ 119 | 1655 $\pm$ 332  |
|                 | 296 $\pm$ 117               | 2819 $\pm$ 1407 | 282 $\pm$ 147 | 2333 $\pm$ 1296 | 337 $\pm$ 127 | 2943 $\pm$ 1292 |
| <i>Entrance</i> | 301 $\pm$ 101               | 2987 $\pm$ 761  | 100 $\pm$ 27  | 923 $\pm$ 282   | 99 $\pm$ 28   | 1605 $\pm$ 479  |
|                 | 225 $\pm$ 51                | 2076 $\pm$ 877  | 73 $\pm$ 34   | 832 $\pm$ 242   | 60 $\pm$ 15   | 1032 $\pm$ 651  |
| <i>End</i>      | 114 $\pm$ 47                | 1754 $\pm$ 397  | 44 $\pm$ 43   | 1913 $\pm$ 668  | 78 $\pm$ 48   | 1506 $\pm$ 1177 |
|                 |                             |                 |               |                 |               |                 |
| <i>Distal</i>   |                             |                 |               |                 |               |                 |
|                 |                             |                 |               |                 |               |                 |

Images of YFP+ and  $\beta$ -III tubulin+ axons of a control (uninjured) nerve were taken prior to undertaking the study. The baseline fluorescence for both YFP and  $\beta$ -III tubulin expression are similar to what was observed in the proximal stump of the injured sciatic nerve.

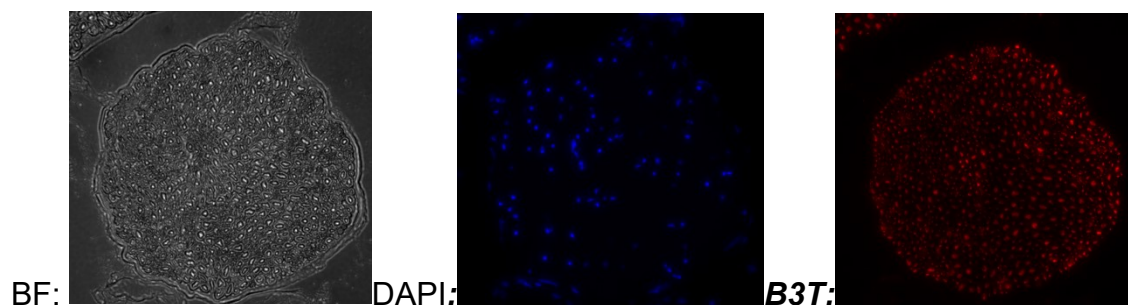

**YFP:**

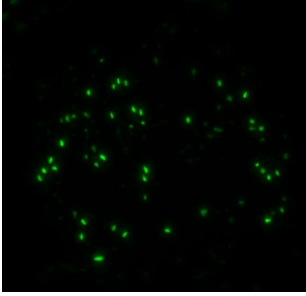

**Supplementary table 2. Defining characteristic of experimental mice.**

| MOUSE TYPE        | D.O.B      | INTERVENTION | DATE OF SURGERY | AGE AT TIME OF SURGERY (MONTHS) | SEX |
|-------------------|------------|--------------|-----------------|---------------------------------|-----|
| THY1-YFP-H        | 22/01/2024 | PCL          | 21/01/2025      | 11                              | F   |
| THY1-YFP-H        | 12/02/2024 | PCL          | 21/01/2025      | 11                              | F   |
| THY1-YFP-H        | 10/03/2024 | PCL          | 21/01/2025      | 10                              | F   |
| THY1-YFP-H        | 12/05/2024 | PCL          | 12/03/2025      | 10                              | M   |
| THY1-YFP-H        | 12/05/2024 | PCL          | 12/03/2025      | 10                              | M   |
| THY1-YFP-H        | 12/09/2024 | PCL          | 12/03/2025      | 6                               | M   |
| THY1-YFP-H        | 18/04/2024 | PCL/GDNF     | 17/03/2025      | 10                              | M   |
| THY1-YFP-H        | 18/04/2024 | PCL/GDNF     | 17/03/2025      | 10                              | M   |
| THY1-YFP-H        | 18/04/2024 | PCL/GDNF     | 17/03/2025      | 10                              | F   |
| THY1-YFP-H        | 18/04/2024 | PCL/GDNF     | 17/03/2025      | 10                              | F   |
| THY1-YFP-H        | 18/04/2024 | PCL/GDNF     | 17/03/2025      | 10                              | F   |
| THY1-YFP-H        | 10/03/2024 | PCL/GDNF     | 12/03/2025      | 12                              | F   |
| THY1-YFP-H        | 10/03/2024 | Graft        | 11/03/2025      | 12                              | F   |
| THY1-YFP-H        | 18/04/2024 | Graft        | 11/03/2025      | 10                              | F   |
| THY1-YFP-H        | 03/06/2024 | Graft        | 10/03/2025      | 9                               | F   |
| THY1-YFP-H        | 13/05/2024 | Graft        | 10/03/2025      | 9                               | F   |
| THY1-YFP-H        | 18/04/2024 | Graft        | 11/03/2025      | 10                              | M   |
| THY1-YFP-H        | 18/04/2024 | Graft        | 11/03/2025      | 10                              | M   |
| <b>C57B/6J</b>    | 24/02/2024 | Donor        | 10/03/2025      | 12                              | F   |
| <b>C57B/6J</b>    | 24/02/2024 | Donor        | 11/03/2025      | 12                              | F   |
| <b>C57B/6J</b>    | 24/02/2024 | Donor        | 11/03/2025      | 12                              | F   |
|                   | PCL        | PCL/GDNF     | Graft           |                                 |     |
| <b>AGE (MEAN)</b> | 9.66666667 | 10.33333333  | 10              |                                 |     |
| <b>SD</b>         | 1.86189867 | 0.816496581  | 1.095445115     |                                 |     |
