# Supplementary material for: Evaluation of a GDNF-eluting nanofibrous PCL conduit in a mouse model of peripheral nerve injury
Source: RSC Adv. 2026 May 5;16(25):23177–89. doi: 10.1039/d6ra03291e (PMC13141687; doi:10.1039/d6ra03291e)
Supplement: RA-016-D6RA03291E-s003 [file RA-016-D6RA03291E-s003.xlsx]

## Sheet: Axon count 1 (YFP)
Number of axons (B3T)								Number of axons (YFP)
	Mouse ID	Region	Axon count		Total axons (percentage)				Mouse ID	Region	Axon count		Total axons (percentage)					Mean (PCL)	Mean (GDNF)	SD (PCL)	SD (GDNF)
PCL	366515	Proximal	4515		100			PCL	366515	Proximal	185		100		170.667		Proximal	100	100	0	0
		Entrance	2128		47.1318					Entrance	97		52.4324				Entrance	152.952	291.005	137.815	200.741
		Middle	1256		27.8184					Middle	20		10.8108				Middle	53.8052	105.736	51.6342	83.2067
		Exit	1546		34.2414					Exit	7		3.78378				Exit	27.6741	28.5165	30.6631	24.151
		Distal	1637		36.2569					Distal	11		5.94595				Distal	17.8221	27.6562	18.852	18.5275
PCL	363491	Proximal	11594		100			PCL	363491	Proximal	116		100
		Entrance	3182		27.4452					Entrance	150		129.31
		Middle	1568		13.5242					Middle	56		48.2759
		Exit	886		7.64188					Exit	32		27.5862
		Distal	1597		13.7744					Distal	57		49.1379
PCL	362903	Proximal	7601		100			PCL	362903	Proximal	401		100
		Entrance	3676		48.3621					Entrance	213		53.1172
		Middle	1740		22.8917					Middle	93		23.192
		Exit	1377		18.116					Exit	47		11.7207
		Distal	2951		38.8238					Distal	16		3.99002
								PCL	363493	Proximal	73		100
										Entrance	252		345.205
										Middle	97		132.877
										Exit	22		30.137
										Distal	5		6.84932
								PCL	364545	Proximal	87		100
										Entrance	265		304.598
										Middle	87		100
										Exit	75		86.2069
										Distal	29		33.3333
								PCL	363492	Proximal	469		100
										Entrance	155		33.049
										Middle	36		7.67591
										Exit	31		6.60981
										Distal	36		7.67591
								GDNF	361273	Proximal	85		100
										Entrance	83		97.6471
										Middle	54		63.5294
										Exit	10		11.7647
										Distal	16		18.8235
								GDNF	367077	Proximal	49		100
										Entrance	248		506.122
										Middle	61		124.49
										Exit	33		67.3469
										Distal	14		28.5714
								GDNF	367074	Proximal	32		100
										Entrance	108		337.5
										Middle	74		231.25
										Exit	14		43.75
										Distal	17		53.125
								GDNF	367078	Proximal	197		100
										Entrance	267		135.533
										Middle	81		41.1168
										Exit	26		13.198
										Distal	38		19.2893
								GDNF	367073	Proximal	25		100
										Entrance	136		544
										Middle	41		164
										Exit	8		32
										Distal	11		44
								GDNF	367080	Proximal	329		100
										Entrance	412		125.228
										Middle	33		10.0304
										Exit	10		3.03951
										Distal	7		2.12766

## Sheet: Axon count 2 (new YFP images)
Number of axons (B3T)								Number of axons (YFP)
	Mouse ID	Region	Axon count		Total axons (percentage)				Mouse ID	Region	Axon count		Total axons (percentage)				YFP (axon %)	PCL	GDNF	GRAFT	SD (PCL)	SD (GDNF)	SD (Graft)
PCL	366515	Proximal			#DIV/0!			PCL	366515	Proximal	122		100		#REF!		Proximal	100	100	100	0	0	0
		Entrance			#DIV/0!					Entrance	30		24.5902				Entrance	135.859	272.52	178.966	92.7916	112.803	43.3297
		Middle			#DIV/0!					Middle	39		31.9672				Middle	54.3483	86.6328	150.896	32.462	50.723	1.52967
		Exit			#DIV/0!					Exit	22		18.0328				Exit	27.4024	60.8426	102.555	23.3012	24.1321	46.7231
		Distal			#DIV/0!					Distal	7		5.7377				Distal	19.9831	43.0941	62.1721	16.4117	10.7034	32.723
PCL	363491	Proximal	2218		100			PCL	363491	Proximal	186		100
		Entrance	4549		205.095					Entrance	248		133.333			Proximal average	173.615
		Middle	860		38.7737					Middle	85		45.6989
		Exit	597		26.9161					Exit	28		15.0538
		Distal	2095		94.4545					Distal	14		7.52688
PCL	362903	Proximal			#DIV/0!			PCL	362903	Proximal	84		100
		Entrance			#DIV/0!					Entrance	163		194.048
		Middle			#DIV/0!					Middle	54		64.2857
		Exit			#DIV/0!					Exit	24		28.5714
		Distal			#DIV/0!					Distal	32		38.0952
PCL	363493	Proximal	3781		100			PCL	363493	Proximal	679		100
		Entrance	820		21.6874					Entrance	182		26.8041
		Middle	591		15.6308					Middle	60		8.83652
		Exit	692		18.302					Exit	43		6.33284
		Distal	2707		71.5948					Distal	93		13.6966
PCL	364545	Proximal	1591		100			PCL	364545	Proximal	159		100
		Entrance	3030		190.446					Entrance	395		248.428
		Middle	1279		80.3897					Middle	159		100
		Exit	1248		78.4412					Exit	115		72.327
		Distal	1861		116.97					Distal	69		43.3962
PCL	363492	Proximal	912		100			PCL	363492	Proximal	166		100
		Entrance	1913		209.759					Entrance	312		187.952
		Middle	1061		116.338					Middle	125		75.3012
		Exit	809		88.7061					Exit	40		24.0964				B3T (axon %)	PCL	GDNF	GRAFT	SD (PCL)	SD (GDNF)	SD (Graft)
		Distal	1709		187.39					Distal	19		11.4458				Proximal	100	100	100	0	0	0
																	Entrance	156.747	322.627	109.912	90.4148	277.75	27.9933
																	Middle	62.783	166.839	157.438	44.6389	121.342	37.4167
GDNF	361273	Proximal	1673		100			GDNF	361273	Proximal	128		100				Exit	53.0914	107.167	117.194	35.6205	106.345	22.5467
		Entrance	1314		78.5415					Entrance	172		134.375				Distal	117.603	185.044	90.691	50.0775	124.857	26.3222
		Middle	1755		104.901					Middle	89		69.5312
		Exit	1370		81.8888					Exit	75		58.5938
		Distal	3239		193.604					Distal	65		50.7812
GDNF	367077	Proximal	669		100			GDNF	367077	Proximal	104		100
		Entrance	4658		696.263					Entrance	379		364.423
		Middle	2275		340.06					Middle	79		75.9615
		Exit	2101		314.051					Exit	75		72.1154
		Distal	2514		375.785					Distal	45		43.2692
																	B3T (axon count	PCL	GDNF	GRAFT	SD (PCL)	SD (GDNF)	SD (Graft)
GDNF	367074	Proximal	570		100			GDNF	367074	Proximal	80		100				Proximal	2125.5	1280.33	2194	1225.77	613.004	503.46
		Entrance	3718		652.281					Entrance	239		298.75				Entrance	2578	2913.33	2341	1593.94	1255.33	60.8112
		Middle	1690		296.491					Middle	139		173.75				Middle	947.75	1568	3360	292.986	466.264	28.2843
		Exit	667		117.018					Exit	56		70				Exit	836.5	1007.83	2628	287.709	622.856	1084.7
		Distal	708		124.211					Distal	44		55				Distal	2093	2114.5	1923.5	439.044	1321.02	120.915
GDNF	367078	Proximal	1370		100			GDNF	367078	Proximal	292		100
		Entrance	1676		122.336					Entrance	382		364.423
		Middle	1289		94.0876					Middle	150		75.9615
		Exit	872		63.6496					Exit	69		72.1154
		Distal	3881		283.285					Distal	127		43.2692
GDNF	367073	Proximal	1207		100			GDNF	367073	Proximal	66		100
		Entrance	2887		239.188					Entrance	229		346.97
		Middle	1506		124.772					Middle	69		104.545
		Exit	513		42.5021					Exit	52		78.7879
		Distal	710		58.8235					Distal	28		42.4242
GDNF	367080	Proximal	2193		100			GDNF	367080	Proximal	424		100
		Entrance	3227		147.15					Entrance	535		126.179
		Middle	893		40.7205					Middle	85		20.0472
		Exit	524		23.8942					Exit	57		13.4434
		Distal	1635		74.5554					Distal	101		23.8208
Graft	359731	Proximal	1838		100			Graft	359731	Proximal	269		100
		Entrance	2384		129.706					Entrance	399		148.327
		Middle	3380		183.896					Middle	403		149.814
		Exit	1861		101.251					Exit	187		69.5167
		Distal	2009		109.304					Distal	105		39.0335
Graft	370887	Proximal	2550		100			Graft	370887	Proximal	177		100
		Entrance	2298		90.1176					Entrance	371		209.605
		Middle	3340		130.98					Middle	269		151.977
		Exit	3395		133.137					Exit	240		135.593
		Distal	1838		72.0784					Distal	151		85.3107

## Sheet: Mean YFP prox count taken
Number of axons (YFP)
	Mouse ID	Region	Axon count		Total axons (percentage)					PCL	GDNF	GRAFT	SD (PCL)	SD (GDNF)	SD (Graft)
PCL	366515	Proximal	173		100		#REF!		Proximal	100	100	100	0	0	0
		Entrance	30		17.341				Entrance	128.131	186.224	222.543	73.4124	77.5105	11.4445
		Middle	39		22.5434				Middle	50.289	52.0231	194.22	26.8074	14.4161	54.7701
		Exit	22		12.7168				Exit	26.2042	37.5723	123.41	20.3339	6.4055	21.6628
		Distal	7		4.04624				Distal	22.5434	31.5992	73.9884	19.8797	14.7718	18.8017
PCL	363491	Proximal	173		100
		Entrance	248		143.353			Proximal average	173
		Middle	85		49.1329
		Exit	28		16.185
		Distal	14		8.09249
PCL	362903	Proximal	173		100
		Entrance	163		94.2197
		Middle	54		31.2139
		Exit	24		13.8728
		Distal	32		18.4971
PCL	363493	Proximal	173		100
		Entrance	182		105.202
		Middle	60		34.6821
		Exit	43		24.8555
		Distal	93		53.7572
PCL	364545	Proximal	173		100
		Entrance	395		228.324
		Middle	159		91.9075
		Exit	115		66.474
		Distal	69		39.8844
PCL	363492	Proximal	173		100
		Entrance	312		180.347
		Middle	125		72.2543
		Exit	40		23.1214
		Distal	19		10.9827
GDNF	361273	Proximal	173		100
		Entrance	172		99.422
		Middle	89		51.4451
		Exit	75		43.3526
		Distal	65		37.5723
GDNF	367077	Proximal	173		100
		Entrance	379		219.075
		Middle	79		45.6647
		Exit	75		43.3526
		Distal	45		26.0116
GDNF	367074	Proximal	173		100
		Entrance	239		138.15
		Middle	139		80.3468
		Exit	56		32.3699
		Distal	44		25.4335
GDNF	367078	Proximal	173		100
		Entrance	382		219.075
		Middle	150		45.6647
		Exit	69		43.3526
		Distal	127		26.0116
GDNF	367073	Proximal	173		100		1	30260.6	255	7.71646e+06	291855915		255	255
		Entrance	229		132.37
		Middle	69		39.8844
		Exit	52		30.0578
		Distal	28		16.185		1	2381.73	255	607341	22971165		255	255
GDNF	367080	Proximal	173		100
		Entrance	535		309.249
		Middle	85		49.1329
		Exit	57		32.948
		Distal	101		58.3815
Graft	359721	Proximal	173		100
		Entrance	399		230.636
		Middle	403		232.948
		Exit	187		108.092
		Distal	105		60.6936
Graft	370887	Proximal	173		100
		Entrance	371		214.451
		Middle	269		155.491
		Exit	240		138.728
		Distal	151		87.2832

## Sheet: Mean B3T prox count taken
Number of axons (B3T)
	Mouse ID	Region	Axon count		Total axons (percentage)			B3T (axon count	PCL	GDNF	GRAFT	SD (PCL)	SD (GDNF)	SD (Graft)
PCL	366515	Proximal			#DIV/0!			Proximal	100	100	100	0	0	0
		Entrance			#DIV/0!			Entrance	150.408	169.973	136.581	92.9953	73.2399	3.54791
		Middle			#DIV/0!			Middle	55.2946	91.4819	196.033	17.0937	27.2033	1.65019
		Exit			#DIV/0!			Exit	48.804	58.8001	153.326	16.7858	36.3393	63.2848
		Distal			#DIV/0!			Distal	122.112	123.366	112.223	25.6152	77.0721	7.05457
PCL	363491	Proximal	1714		100
		Entrance	4549		265.403
		Middle	860		50.175
		Exit	597		34.8308
		Distal	2095		122.229
PCL	362903	Proximal			#DIV/0!			Proximal average	1714
		Entrance			#DIV/0!
		Middle			#DIV/0!
		Exit			#DIV/0!
		Distal			#DIV/0!
PCL	363493	Proximal	1714		100
		Entrance	820		47.8413
		Middle	591		34.4807
		Exit	692		40.3734
		Distal	2707		157.935
PCL	364545	Proximal	1714		100
		Entrance	3030		176.779
		Middle	1279		74.6208
		Exit	1248		72.8121
		Distal	1861		108.576
PCL	363492	Proximal	1714		100
		Entrance	1913		111.61
		Middle	1061		61.902
		Exit	809		47.1995
		Distal	1709		99.7083
GDNF	361273	Proximal	1714		100
		Entrance	1314		76.6628
		Middle	1755		102.392
		Exit	1370		79.93
		Distal	3239		188.973
GDNF	367077	Proximal	1714		100
		Entrance	4658		271.762
		Middle	2275		132.73
		Exit	2101		122.579
		Distal	2514		146.674
GDNF	367074	Proximal	1714		100
		Entrance	3718		216.919
		Middle	1690		98.5998
		Exit	667		38.9148
		Distal	708		41.3069
GDNF	367078	Proximal	1714		100
		Entrance	1676		97.783
		Middle	1289		75.2042
		Exit	872		50.8751
		Distal	3881		226.429
GDNF	367073	Proximal	1714		100
		Entrance	2887		168.436
		Middle	1506		87.8646
		Exit	513		29.93
		Distal	710		41.4236
GDNF	367080	Proximal	1714		100
		Entrance	3227		188.273
		Middle	893		52.1004
		Exit	524		30.5718
		Distal	1635		95.3909
Graft	359731	Proximal	1714		100
		Entrance	2384		139.09
		Middle	3380		197.2
		Exit	1861		108.576
		Distal	2009		117.211
Graft	370887	Proximal	1714		100
		Entrance	2298		134.072
		Middle	3340		194.866
		Exit	3395		198.075
		Distal	1838		107.235

## Sheet: Box plots
Number of axons (YFP)
					Material		Proximal	Entrance	Middle	Exit	Distal
	Mouse ID	Region	Axon count		PCL		122	30	39	22	7
PCL	366515	Proximal	122		PCL		186	248	85	28	14
		Entrance	30		PCL		84	163	54	24	32
		Middle	39		PCL		679	182	60	43	93
		Exit	22		PCL		159	395	159	115	69
		Distal	7		PCL		166	312	125	40	19
					GDNF		128	172	89	75	65
PCL	363491	Proximal	186		GDNF		104	379	79	75	45
		Entrance	248		GDNF		80	239	139	56	44
		Middle	85		GDNF		292	382	150	69	127
		Exit	28		GDNF		66	229	69	52	28
		Distal	14		GDNF		424	535	85	57	101
					Graft		269	399	403	187	105
PCL	362903	Proximal	84		Graft		177	371	269	240	151
		Entrance	163
		Middle	54
		Exit	24			366515
		Distal	32			363491
						362903
PCL	363493	Proximal	679			363493
		Entrance	182			364545
		Middle	60			363492
		Exit	43			361273
		Distal	93			367077
						367074
PCL	364545	Proximal	159			367078
		Entrance	395			367073
		Middle	159			367080
		Exit	115			359731
		Distal	69			370887
PCL	363492	Proximal	166
		Entrance	312
		Middle	125
		Exit	40
		Distal	19
GDNF	361273	Proximal	128
		Entrance	172
		Middle	89
		Exit	75
		Distal	65
GDNF	367077	Proximal	104
		Entrance	379
		Middle	79
		Exit	75
		Distal	45
GDNF	367074	Proximal	80
		Entrance	239
		Middle	139
		Exit	56
		Distal	44
GDNF	367078	Proximal	292
		Entrance	382
		Middle	150
		Exit	69
		Distal	127
GDNF	367073	Proximal	66
		Entrance	229
		Middle	69
		Exit	52
		Distal	28
GDNF	367080	Proximal	424
		Entrance	535
		Middle	85
		Exit	57
		Distal	101
Graft	359731	Proximal	269
		Entrance	399
		Middle	403				Graft	359731	Proximal	269
		Exit	187						Entrance	399
		Distal	105						Middle	403
									Exit	187
Graft	370887	Proximal	177						Distal	105
		Entrance	371
		Middle	269				Graft	370887	Proximal	177
		Exit	240						Entrance	371
		Distal	151						Middle	269
									Exit	240
									Distal	151

## Sheet: Newest YFP
Number of axons (B3T)								Number of axons (YFP)
	Mouse ID	Region	Axon count		Total axons (percentage)				Mouse ID	Region	Axon count	Total Area	Average size (um squared)	Total axons (percentage)	Total area (%)									YFP (axon count %)	PCL	GDNF	GRAFT	SD (PCL)	SD (GDNF)	SD (Graft)
PCL	366515	Proximal			#DIV/0!			PCL	366515	Proximal	147	4949.26	33.668	100	100		366515_366515 20x end_ch00_SV.tif	94	707.89	7.531	0.021			Proximal	100	100	100	0	0	0
		Entrance			#DIV/0!					Entrance	58	715.326	12.333	39.4558	14.4532		366515_366515 20x entrance 3_ch00_SV.tif	58	715.326	12.333	0.031			Entrance	239.443	334.816	221.742	147.12	247.871	102.656
		Middle			#DIV/0!					Middle	91	881.956	9.692	61.9048	17.82		366515_366515 20x middle_ch00_SV.tif	91	881.956	9.692	0.019			Middle	88.7101	102.867	215.734	52.4156	61.5476	62.037
		Exit			#DIV/0!					Exit	94	707.89	7.531	63.9456	14.303		366515_366515 20x proximal_ch00_SV.tif	147	4949.26	33.668	0.144			End	57.4586	67.7832	176.422	29.7111	52.8173	73.3939
		Distal			#DIV/0!					Distal	7	104.209	14.887	4.7619	2.10555		366515_366515 distal 20x_ch00_SV.tif	7	104.209	14.887	0.007			Distal	34.7341	62.9458	88.0332	31.5913	27.157	45.7882
PCL	363491	Proximal			#DIV/0!			PCL	363491	Proximal	115	7439.28	64.689	100	100		363491_363491 30x distal_ch00_SV.tif	17	422.911	24.877	0.007
		Entrance			#DIV/0!					Entrance	274	9189.05	33.537	238.261	123.521		363491_363491 40x end_ch00_SV.tif	46	1190.92	25.89	0.016
		Middle			#DIV/0!					Middle	82	2839.2	34.624	71.3043	38.165		363491_363491 40x entrance_ch00_SV.tif	274	9189.05	33.537	0.081
		Exit			#DIV/0!					Exit	46	1190.92	25.89	40	16.0085		363491_363491 40x middle_ch00_SV.tif	82	2839.2	34.624	0.026
		Distal			#DIV/0!					Distal	17	422.911	24.877	14.7826	5.68484		363491_363491 40x prox_ch00_SV.tif	115	7439.28	64.689	0.214
PCL	362903	Proximal			#DIV/0!			PCL	362903	Proximal	205	10719.9	52.292	100	100		362903 PCL_362903 40x Distal B3T_ch00_SV.tif	31	651.648	21.021
		Entrance			#DIV/0!					Entrance	484	17629.4	36.424	236.098	164.454		362903 PCL_362903 40x End B3T_ch00_SV.tif	104	3242.32	31.176
		Middle			#DIV/0!					Middle	95	3456.5	36.384	46.3415	32.2437		362903 PCL_362903 40x Entrance B3T_ch00_SV.tif	484	17629.4	36.424				YFP (axon count)	PCL	GDNF	GRAFT	SD (PCL)	SD (GDNF)	SD (Graft)
		Exit			#DIV/0!					Exit	104	3242.32	31.176	50.7317	30.2457		362903 PCL_362903 40x Middle B3T_ch00_SV.tif	95	3456.5	36.384				Proximal	133	152.833	145	47.3498	118.753	60.193
		Distal			#DIV/0!					Distal	31	651.648	21.021	15.122	6.07884		362903 PCL_362903 40x Proximal B3T_ch00_SV.tif	205	10719.9	52.292				Entrance	281.5	337.333	296.167	147.192	126.538	117.377
																								Middle	100	98.8333	301.333	26.9815	27.5058	101.49
PCL	363493	Proximal			#DIV/0!			PCL	363493	Proximal	160	28704	48.569	100	100		363492 PCL_363482 PCL 40x Distal B3Tub_ch00_SV.tif	117	2427.08	20.744	0.041			End	72.6667	59.5	225.167	33.5241	14.5017	50.8701
		Entrance			#DIV/0!					Entrance	190	6277.27	33.038	118.75	21.8689		363492 PCL_363482 PCL 40x End B3Tub_ch00_SV.tif	47	1702.22	36.218	0.019			Distal	44	78.3333	113.667	42.8299	48.1774	46.6247
		Middle			#DIV/0!					Middle	69	2125.45	30.804	43.125	7.4047		363492 PCL_363482 PCL 40x Entrance B3Tub_ch00_SV.tif	190	6277.27	33.038	0.085
		Exit			#DIV/0!					Exit	47	1702.22	36.218	29.375	5.93026		363492 PCL_363482 PCL 40x Middle B3Tub_ch00_SV.tif	69	2125.45	30.804	0.024
		Distal			#DIV/0!					Distal	117	2427.08	20.744	73.125	8.45554		363492 PCL_363482 PCL 40x Prox B3Tub_ch00_SV.tif	591	28704	48.569	0.836
PCL	364545	Proximal			#DIV/0!			PCL	364545	Proximal	97	5565.4	57.375	100	100		364545 PCL_364545 PCL 40x Distal b3t_ch00_SV.tif	74	2687.86	36.322	0.079
		Entrance			#DIV/0!					Entrance	371	14722.5	39.683	382.474	264.536		364545 PCL_364545 PCL 40x End b3t_ch00_SV.tif	110	4423.6	40.215	0.029
		Middle			#DIV/0!					Middle	143	7377.07	51.588	147.423	132.552		364545 PCL_364545 PCL 40x Entrance b3t_ch00_SV.tif	371	14722.5	39.683	0.133
		Exit			#DIV/0!					Exit	110	4423.6	40.215	113.402	79.484		364545 PCL_364545 PCL 40x Middle b3t_ch00_SV.tif	143	7377.07	51.588	0.055
		Distal			#DIV/0!					Distal	74	2687.86	36.322	76.2887	48.296		364545 PCL_364545 PCL 40x Proximal b3t_ch00_SV.tif	97	5565.4	57.375	0.164
																									Axon count YFP
PCL	363492	Proximal			#DIV/0!			PCL	363492	Proximal	74	4905.69	66.293	100	100		363492 PCL_363492 PCL 40x Distal b3t_ch00_SV.tif	18	606.822	33.712	0.018		Material		Proximal	Entrance	Middle	End	Distal
		Entrance			#DIV/0!					Entrance	312	13737.1	44.029	421.622	280.023		363492 PCL_363492 PCL 40x End b3t_ch00_SV.tif	35	1417.66	40.505	0.013			PCL	147	58	91	94	7
		Middle			#DIV/0!					Middle	120	5982.76	49.856	162.162	121.956		363492 PCL_363492 PCL 40x Entrance b3t_ch00_SV.tif	312	13737.1	44.029	0.124			PCL	115	274	82	46	17
		Exit			#DIV/0!					Exit	35	1417.66	40.505	47.2973	28.8984		363492 PCL_363492 PCL 40x Mid b3t_ch00_SV.tif	120	5982.76	49.856	0.039			PCL	205	484	95	104	31
		Distal			#DIV/0!					Distal	18	606.822	33.712	24.3243	12.3698		363492 PCL_363492 PCL 40x Proximal b3t_ch00_SV.tif	74	4905.69	66.293	0.11			PCL	160	190	69	47	117
																								PCL	97	371	143	110	74
																	361273 GDNF_361273 GDNF 40x Distal b3t_ch00_SV.tif	84	2233.95	26.595	0.049			PCL	74	312	120	35	18
GDNF	361273	Proximal			#DIV/0!			GDNF	361273	Proximal	94	5184.28	55.152	100	100		361273 GDNF_361273 GDNF 40x End b3t_ch00_SV.tif	73	2557.05	35.028	0.016			GDNF	94	194	111	73	84
		Entrance			#DIV/0!					Entrance	194	6076.08	31.32	206.383	117.202		361273 GDNF_361273 GDNF 40x Entrance b3t_ch00_SV.tif	194	6076.08	31.32	0.04			GDNF	50	378	87	75	46
		Middle			#DIV/0!					Middle	111	3623.34	32.643	118.085	69.8909		361273 GDNF_361273 GDNF 40x Mid b3t_ch00_SV.tif	111	3623.34	32.643	0.028			GDNF	37	288	122	45	46
		Exit			#DIV/0!					Exit	73	2557.05	35.028	77.6596	49.3232		361273 GDNF_361273 GDNF 40x Proximal b3t_ch00_SV.tif	94	5184.28	55.152	0.222			GDNF	221	441	134	69	153
		Distal			#DIV/0!					Distal	84	2233.95	26.595	89.3617	43.0909		361273 cropped GDNF_361273 GDNF 40x End b3t_ch00_SV.tif	73	2557.05	35.028	0.016			GDNF	41	214	69	43	27
																								GDNF	351	509	70	52	114
GDNF	367077	Proximal			#DIV/0!			GDNF	367077	Proximal	50	3743.78	74.876	100	100		367077 GDNF_367077 GDNF 40x Distal B3t_ch00_SV.tif	46	1943.63	42.253	0.043			GRAFT	143	343	273	262	164
		Entrance			#DIV/0!					Entrance	378	14573	38.553	756	389.258		367077 GDNF_367077 GDNF 40x End B3t_ch00_SV.tif	75	2923.51	38.98	0.016			GRAFT	263	406	457	187	98
		Middle			#DIV/0!					Middle	87	2650.58	30.466	174	70.7995		367077 GDNF_367077 GDNF 40x Entrance B3t_ch00_SV.tif	378	14573	38.553	0.095			GRAFT	112	274	210	258	171
		Exit			#DIV/0!					Exit	75	2923.51	38.98	150	78.0899		367077 GDNF_367077 GDNF 40x Middle B3t_ch00_SV.tif	87	2650.58	30.466	0.017			GRAFT	140	78	309	143	48
		Distal			#DIV/0!					Distal	46	1943.63	42.253	92	51.9163		367077 GDNF_367077 GDNF 40x Proximal B3t_ch00_SV.tif	50	3743.78	74.876	0.234			GRAFT	102	299	187	228	92
																								GRAFT	110	377	372	273	109
GDNF	367074	Proximal			#DIV/0!			GDNF	367074	Proximal	160	3084.91	83.376	100	100		367074 GDNF_367074 GDNF 40x Distal B3T_ch00_SV.tif	46	1721.29	37.419	0.05
		Entrance			#DIV/0!					Entrance	288	7800.4	27.085	180	252.857		367074 GDNF_367074 GDNF 40x End B3T_ch00_SV.tif	45	1934.21	42.982	0.018
		Middle			#DIV/0!					Middle	122	4188.37	34.331	76.25	135.77		367074 GDNF_367074 GDNF 40x Entrance B3T_ch00_SV.tif	288	7800.4	27.085	0.051			YFP (axon size μm2)	PCL	GDNF	GRAFT	SD (PCL)	SD (GDNF)	SD (Graft)
		Exit			#DIV/0!					Exit	45	1934.21	42.982	28.125	62.699		367074 GDNF_367074 GDNF 40x Middle B3T_ch00_SV.tif	122	4188.37	34.331	0.033			Proximal	53.8143	62.1992	58.5522	12.0196	13.7873	6.49895
		Distal			#DIV/0!					Distal	46	1721.29	37.419	28.75	55.797		367074 GDNF_367074 GDNF 40x Proximal B3T_ch00_SV.tif	37	3084.91	83.376	0.199			Entrance	33.174	37.5185	42.57	11.0023	10.5329	13.2651
																								Middle	35.4913	35.4427	33.687	15.1959	5.78994	5.49963
GDNF	367078	Proximal			#DIV/0!			GDNF	367078	Proximal	221	11779.8	53.302	100	100		367078 GDNF_367078 GDNF 40x Distal B3t_ch00_SV.tif	153	4216.02	27.556	0.07			End	30.2558	37.6833	37.9952	12.4588	5.96275	9.18533
		Entrance			#DIV/0!					Entrance	441	12346.4	27.996	199.548	104.81		367078 GDNF_367078 GDNF 40x End B3t_ch00_SV.tif	69	2373.88	34.404	0.021			Distal	25.2605	33.8498	34.0853	8.24516	6.65058	12.9239
		Middle			#DIV/0!					Middle	134	5827.97	43.492	60.6335	49.4741		367078 GDNF_367078 GDNF 40x Entrance B3t_ch00_SV.tif	441	12346.4	27.996	0.361
		Exit			#DIV/0!					Exit	69	2373.88	34.404	31.2217	20.152		367078 GDNF_367078 GDNF 40x Middle B3t_ch00_SV.tif	134	5827.97	43.492	0.044
		Distal			#DIV/0!					Distal	153	4216.02	27.556	69.2308	35.7902		367078 GDNF_367078 GDNF 40x Proximal B3t_ch00_SV.tif	221	11779.8	53.302	0.341
GDNF	367073	Proximal			#DIV/0!			GDNF	367073	Proximal	41	1973.8	48.141	100	100		367073 GDNF_367073 GDNF 40x Distal B3t_ch00_SV.tif	27	1062.31	39.345	0.024
		Entrance			#DIV/0!					Entrance	214	10779.1	50.37	521.951	546.111		367073 GDNF_367073 GDNF 40x End B3t_ch00_SV.tif	43	1952.85	45.415	0.018
		Middle			#DIV/0!					Middle	69	2070.26	30.004	168.293	104.887		367073 GDNF_367073 GDNF 40x Entrance B3t_ch00_SV.tif	214	10779.1	50.37	0.084
		Exit			#DIV/0!					Exit	43	1952.85	45.415	104.878	98.9387		367073 GDNF_367073 GDNF 40x Middle B3t_ch00_SV.tif	69	2070.26	30.004	0.016
		Distal			#DIV/0!					Distal	27	1062.31	39.345	65.8537	53.8205		367073 GDNF_367073 GDNF 40x Prox B3t_ch00_SV.tif	41	1973.8	48.141	0.086
GDNF	367080	Proximal			#DIV/0!			GDNF	367080	Proximal	351	20480	58.348	100	100		367080 GDNF_367080 GDNF 40x Distal B3t_ch00_SV.tif	114	3412.09	29.931	0.031
		Entrance			#DIV/0!					Entrance	509	25341.5	49.787	145.014	123.738		367080 GDNF_367080 GDNF 40x End B3t_ch00_SV.tif	52	1523.13	29.291	0.01
		Middle			#DIV/0!					Middle	70	2920.37	41.72	19.943	14.2596		367080 GDNF_367080 GDNF 40x Entrance B3t_ch00_SV.tif	509	25341.5	49.787	0.23
		Exit			#DIV/0!					Exit	52	1523.13	29.291	14.8148	7.43716		367080 GDNF_367080 GDNF 40x Middle B3t_ch00_SV.tif	70	2920.37	41.72	0.019
		Distal			#DIV/0!					Distal	114	3412.09	29.931	32.4786	16.6606		367080 GDNF_367080 GDNF 40x Prox B3t_ch00_SV.tif	351	20480	58.348	0.344
Graft	359731	Proximal			#DIV/0!			Graft	359731	Proximal	143	9511.42	66.513	100	100		359731 Graft_359731 Graft 40x Distal B3T_ch00_SV.tif	164	7949.23	48.471	0.231
		Entrance			#DIV/0!					Entrance	343	17018.6	49.617	239.86	178.928		359731 Graft_359731 Graft 40x End B3T_ch00_SV.tif	262	9833.68	37.533	0.286
		Middle			#DIV/0!					Middle	273	9502.73	34.809	190.909	99.9086		359731 Graft_359731 Graft 40x Entrance B3T_ch00_SV.tif	343	17018.6	49.617	0.283
		Exit			#DIV/0!					Exit	262	9833.68	37.533	183.217	103.388		359731 Graft_359731 Graft 40x Mid B3T_ch00_SV.tif	273	9502.73	34.809	0.209
		Distal			#DIV/0!					Distal	164	7949.23	48.471	114.685	83.5756		359731 Graft_359731 Graft 40x Proximal B3T_ch00_SV.tif	143	9511.42	66.513	0.405
Graft	370887	Proximal			#DIV/0!			Graft	370887	Proximal	263	13466.7	51.204	100	100		370887 Graft_370887 Graft 40x Distal B3T_ch00_SV.tif	98	5154.74	52.599	0.149
		Entrance			#DIV/0!					Entrance	406	21047.5	51.841	154.373	156.294		370887 Graft_370887 Graft 40x End B3T_ch00_SV.tif	187	8742.26	46.75	0.256
		Middle			#DIV/0!					Middle	457	18148.4	39.712	173.764	134.766		370887 Graft_370887 Graft 40x Entrance B3T_ch00_SV.tif	406	21047.5	51.841	0.463
		Exit			#DIV/0!					Exit	187	8742.26	46.75	71.1027	64.9178		370887 Graft_370887 Graft 40x Mid B3T_ch00_SV.tif	457	18148.4	39.712	0.402
		Distal			#DIV/0!					Distal	98	5154.74	52.599	37.2624	38.2778		370887 Graft_370887 Graft 40x Proximal B3T_ch00_SV.tif	263	13466.7	51.204	0.389
Graft	359732	Proximal			#DIV/0!			Graft	359732	Proximal	112	7278.83	64.99	100	100		359732 GRAFT_359732 Graft 40x Distal B3T_Processed001_ch00_SV.tif	171	3883.39	22.71	0.167
		Entrance			#DIV/0!					Entrance	274	12956.6	47.287	244.643	178.004		359732 GRAFT_359732 Graft 40x End B3T_ch00_SV.tif	258	6615.87	25.643	0.287
		Middle			#DIV/0!					Middle	210	5926.52	28.222	187.5	81.4213		359732 GRAFT_359732 Graft 40x Entrance B3T_ch00_SV.tif	274	12956.6	47.287	0.283
		Exit			#DIV/0!					Exit	258	6615.87	25.643	230.357	90.892		359732 GRAFT_359732 Graft 40x Mid B3T_Processed001_ch00_SV.tif	210	5926.52	28.222	0.378
		Distal			#DIV/0!					Distal	171	3883.39	22.71	152.679	53.3518		359732 GRAFT_359732 Graft 40x Proximal B3T_ch00_SV.tif	112	7278.83	64.99	0.312
Graft	366516	Proximal			#DIV/0!			Graft	366516	Proximal	140	8331.4	59.51	100	100		366516 GRAFT_366516 Graft 40x Distal B3T_ch00_SV.tif	48	1311.88	27.331	0.056
		Entrance			#DIV/0!					Entrance	78	1260.88	16.165	55.7143	15.1341		366516 GRAFT_366516 Graft 40x End B3T_ch00_SV.tif	143	5033.25	35.198	0.09
		Middle			#DIV/0!					Middle	309	10220.4	33.076	220.714	122.673		366516 GRAFT_366516 Graft 40x Entrance B3T_ch00_SV.tif	78	1260.88	16.165	0.081
		Exit			#DIV/0!					Exit	143	5033.25	35.198	102.143	60.4131		366516 GRAFT_366516 Graft 40x Mid B3T_ch00_SV.tif	309	10220.4	33.076	0.172
		Distal			#DIV/0!					Distal	48	1311.88	27.331	34.2857	15.7463		366516 GRAFT_366516 Graft 40x Proximal B3T_ch00_SV.tif	140	8331.4	59.51	0.358
Graft	367065	Proximal			#DIV/0!			Graft	367065	Proximal	102	5881.38	57.661	100	100		367065 GRAFT_367065 Graft 40x Distal B3T_Processed001_ch00_SV.tif	92	2381.21	25.883	0.103
		Entrance			#DIV/0!					Entrance	299	14210.3	47.526	293.137	241.614		367065 GRAFT_367065 Graft 40x End B3T_ch00_SV.tif	228	7398.44	32.449	0.164
		Middle			#DIV/0!					Middle	187	4995.65	26.715	183.333	84.9402		367065 GRAFT_367065 Graft 40x Entrance B3T_ch00_SV.tif	299	14210.3	47.526	0.24
		Exit			#DIV/0!					Exit	228	7398.44	32.449	223.529	125.794		367065 GRAFT_367065 Graft 40x Mid B3T_ch00_SV.tif	187	4995.65	26.715	0.144
		Distal			#DIV/0!					Distal	92	2381.21	25.883	90.1961	40.4872		367065 GRAFT_367065 Graft 40x Proximal B3T_ch00_SV.tif	102	5881.38	57.661	0.372
Graft	368667	Proximal			#DIV/0!			Graft	368667	Proximal	110	5657.88	51.435	100	100		368667 GRAFT_368667 Graft 40x Distal B3T_ch00_SV.tif	109	2999.45	27.518	0.098
		Entrance			#DIV/0!					Entrance	377	16204.8	42.984	342.727	286.411		368667 GRAFT_368667 Graft 40x End B3T_ch00_SV.tif	273	13758.5	50.398	0.586
		Middle			#DIV/0!					Middle	372	14726.6	39.588	338.182	260.285		368667 GRAFT_368667 Graft 40x Entrance B3T_ch00_SV.tif	377	16204.8	42.984	0.222
		Exit			#DIV/0!					Exit	273	13758.5	50.398	248.182	243.175		368667 GRAFT_368667 Graft 40x Mid B3T_ch00_SV.tif	372	14726.6	39.588	0.482
		Distal			#DIV/0!					Distal	109	2999.45	27.518	99.0909	53.0136		368667 GRAFT_368667 Graft 40x Proximal B3T_ch00_SV.tif	110	5657.88	51.435	0.246
										Average	143.611	8814.32	58.1886

## Sheet: Newest b3t
Number of axons (B3T)								Number of axons (B3T)
	Mouse ID	Region	Axon count		Total axons (percentage)				Mouse ID	Region	Axon count	Total Area	Average size (um squared)	Total axons (percentage)	Total area (%)									B3T (axon count %)	PCL	GDNF	GRAFT	SD (PCL)	SD (GDNF)	SD (Graft)
PCL	366515	Proximal			#DIV/0!			PCL	366515	Proximal	2353	16885.7	7.176	100	100		366515 B3 tub_366515 40x distal z_Processed001_ch02_SV.tif	752	7061.72	9.391	0.627			Proximal	100	100	100	0	0	0
		Entrance			#DIV/0!					Entrance	1501	17301.7	11.527	63.7909	102.463		366515 B3 tub_366515 40x entrance_ch02_SV.tif	1501	17301.7	11.527	0.523			Entrance	138.566	180.007	170.36	78.2576	77.5607	104.743
		Middle			#DIV/0!					Middle	606	11500.1	18.977	25.7544	68.1058		366515 B3 tub_366515 40x middle_ch02_SV.tif	606	11500.1	18.977	0.357			Middle	58.4339	100.962	160.338	38.4437	33.5131	44.0075
		Exit			#DIV/0!					Exit					0		366515 B3 tub_366515 40x prox_ch02_SV.tif	2353	16885.7	7.176	1.992			End	52.8838	63.711	112.356	30.4481	38.7773	54.7534
		Distal			#DIV/0!					Distal	752	7061.72	9.391	31.9592	41.8207									Distal	109.315	94.2939	100.816	55.7407	69.6615	40.9321
PCL	363491	Proximal			#DIV/0!			PCL	363491	Proximal	2229	31442.9	14.106	100	100		363491_363491 30x distal_ch03_SV.tif	2093	20686.7	9.884	1.381
		Entrance			#DIV/0!					Entrance	4546	50398.5	11.086	203.948	160.286		363491_363491 40x end_ch03_SV.tif	619	13027.9	21.047	0.698
		Middle			#DIV/0!					Middle	889	16686	18.769	39.8834	53.0677		363491_363491 40x entrance_ch03_SV.tif	4546	50398.5	11.086	1.77
		Exit			#DIV/0!					Exit	619	13027.9	21.047	27.7703	41.4334		363491_363491 40x middle_ch03_SV.tif	889	16686	18.769	0.607
		Distal			#DIV/0!					Distal	2093	20686.7	9.884	93.8986	65.7911		363491_363491 40x prox_ch03_SV.tif	2229	31442.9	14.106	3.602
PCL	362903	Proximal			#DIV/0!			PCL	362903	Proximal	1470	13366.2	9.093	100	100		cropped 362903 PCL_362903 40x Distal B3T_ch03_SV.tif	2327	15113.9	6.495	3.551
		Entrance			#DIV/0!					Entrance	2129			144.83	0		362903 PCL_362903 40x End B3T_ch03_SV.tif	758	20031.5	26.427	1.085
		Middle			#DIV/0!					Middle	1027			69.8639	0		362903 PCL_362903 40x Entrance B3T_ch03_SV.tif	2129	38837.9	18.242	1.203			B3T (axon count)	PCL	GDNF	GRAFT	SD (PCL)	SD (GDNF)	SD (Graft)
		Exit			#DIV/0!					Exit	758			51.5646	0		362903 PCL_362903 40x Middle B3T_ch03_SV.tif	1027	22253.6	21.669	0.96			Proximal	2064.83	1655	1929	995.114	332.261	586.916
		Distal			#DIV/0!					Distal	2327			158.299	0		cropped 362903 PCL_362903 40x Proximal B3T_ch03_SV.tif	1470	13366.2	9.093	1.807			Entrance	2333.33	2942.67	2818.5	1296.04	1291.53	1406.79
																								Middle	922.5	1605	2987.33	281.971	478.702	761.478
PCL	363493	Proximal			#DIV/0!			PCL	363493	Proximal	3798			100	#DIV/0!		363492 PCL_363482 PCL 40x Distal B3Tub_ch03_SV.tif	2711	33380.7	12.313	2.233			End	832.2	1031.83	2076.17	242.036	650.86	876.533
		Entrance			#DIV/0!					Entrance	861			22.6698	#DIV/0!		363492 PCL_363482 PCL 40x End B3Tub_ch03_SV.tif	708	11814.4	16.687	0.529			Distal	1913.33	1506	1753.83	667.537	1177.33	396.552
		Middle			#DIV/0!					Middle	601			15.8241	#DIV/0!		363492 PCL_363482 PCL 40x Entrance B3Tub_ch03_SV.tif	861	19215.5	22.318	1.033
		Exit			#DIV/0!					Exit	708			18.6414	#DIV/0!		363492 PCL_363482 PCL 40x Middle B3Tub_ch03_SV.tif	601	10161.7	16.908	0.454
		Distal			#DIV/0!					Distal	2711			71.3797	#DIV/0!		363492 PCL_363482 PCL 40x Prox B3Tub_ch03_SV.tif	3798	42832	11.278	4.972
PCL	364545	Proximal			#DIV/0!			PCL	364545	Proximal	1600			100	#DIV/0!		364545 PCL_364545 PCL 40x Distal b3t_ch03_SV.tif	1880	25885.7	13.769	3.038
		Entrance			#DIV/0!					Entrance	3009			188.062	#DIV/0!		364545 PCL_364545 PCL 40x End b3t_ch03_SV.tif	1242	12812.3	10.316	0.329
		Middle			#DIV/0!					Middle	1309			81.8125	#DIV/0!		364545 PCL_364545 PCL 40x Entrance b3t_ch03_SV.tif	3009	25168.2	8.364	0.906
		Exit			#DIV/0!					Exit	1242			77.625	#DIV/0!		364545 PCL_364545 PCL 40x Middle b3t_ch03_SV.tif	1309	22562.5	17.236	0.676
		Distal			#DIV/0!					Distal	1880			117.5	#DIV/0!		364545 PCL_364545 PCL 40x Proximal b3t_ch03_SV.tif	1600	19053.7	11.909	2.233
																									Axon count b3t
PCL	363492	Proximal			#DIV/0!			PCL	363492	Proximal	939			100	#DIV/0!		363492 PCL_363492 PCL 40x Distal b3t_ch03_SV.tif	1717	20437.3	11.903	2.413		Material		Proximal	Entrance	Middle	End	Distal
		Entrance			#DIV/0!					Entrance	1954			208.094	#DIV/0!		363492 PCL_363492 PCL 40x End b3t_ch03_SV.tif	834	15052.9	18.049	0.542			PCL	2353	1501	606		752
		Middle			#DIV/0!					Middle	1103			117.465	#DIV/0!		363492 PCL_363492 PCL 40x Entrance b3t_ch03_SV.tif	1954	32061.3	16.408	1.154			PCL	2229	4546	889	619	2093
		Exit			#DIV/0!					Exit	834			88.8179	#DIV/0!		363492 PCL_363492 PCL 40x Mid b3t_ch03_SV.tif	1103	22995.8	20.848	0.594			PCL	1470	2129	1027	758	2327
		Distal			#DIV/0!					Distal	1717			182.854	#DIV/0!		363492 PCL_363492 PCL 40x Proximal b3t_ch03_SV.tif	939	18722.3	19.939	1.667			PCL	3798	861	601	708	2711
																								PCL	1600	3009	1309	1242	1880
																								PCL	939	1954	1103	834	1717
GDNF	361273	Proximal			#DIV/0!			GDNF	361273	Proximal	1690			100	#DIV/0!		361273 GDNF_361273 GDNF 40x Distal b3t_ch03_SV.tif	3241	34897.7	10.768	3.075			GDNF	1690	1339	1792	1405	3241
		Entrance			#DIV/0!					Entrance	1339			79.2308	#DIV/0!		361273 GDNF_361273 GDNF 40x End b3t_ch03_SV.tif	1405	24081.7	17.14	0.538			GDNF	677	4786	2353	2176	2589
		Middle			#DIV/0!					Middle	1792			106.036	#DIV/0!		361273 GDNF_361273 GDNF 40x Entrance b3t_ch03_SV.tif	1339	20752.4	15.498	0.541			GDNF	1761	3732	1698	669	709
		Exit			#DIV/0!					Exit	1405			83.1361	#DIV/0!		361273 GDNF_361273 GDNF 40x Mid b3t_ch03_SV.tif	1792	25670.3	14.325	0.798			GDNF	1379	1656	1338	897	1502
		Distal			#DIV/0!					Distal	3241			191.775	#DIV/0!		361273 GDNF_361273 GDNF 40x Proximal b3t_ch03_SV.tif	1690	18397.9	10.886	3.145			GDNF	1237	2900	1526	518	695
																								GDNF	2192	3243	923	526	300
GDNF	367077	Proximal			#DIV/0!			GDNF	367077	Proximal	1671			100	#DIV/0!		367077 GDNF_367077 GDNF 40x Distal B3t_ch03_SV.tif	2589	46274.8	17.874	4.076			GRAFT	1819	2374	3368	1865	2011
		Entrance			#DIV/0!					Entrance	4786			286.415	#DIV/0!		367077 GDNF_367077 GDNF 40x End B3t_ch03_SV.tif	2176	43754.7	20.108	0.96			GRAFT	2539	2268	3284	3376	1825
		Middle			#DIV/0!					Middle	2353			140.814	#DIV/0!		367077 GDNF_367077 GDNF 40x Entrance B3t_ch03_SV.tif	4786	74094.7	15.482	1.924			GRAFT	1515	3858	1565	1230	2176
		Exit			#DIV/0!					Exit	2176			130.221	#DIV/0!		367077 GDNF_367077 GDNF 40x Middle B3t_ch03_SV.tif	2353	43616.1	18.536	1.137			GRAFT	2753	604	3756	2152	1026
		Distal			#DIV/0!					Distal	2589			154.937	#DIV/0!		367077 GDNF_367077 GDNF 40x Proximal B3t_ch03_SV.tif	677	8236.85	12.167	2.053			GRAFT	1282	3177	2814	2734	1801
																								GRAFT	1666	4630	3137	1100	1684
GDNF	367074	Proximal			#DIV/0!			GDNF	367074	Proximal	1761			100	#DIV/0!		367074 GDNF_367074 GDNF 40x Distal B3T_ch03_SV.tif	709	8779.61	12.383	1.023
		Entrance			#DIV/0!					Entrance	3732			211.925	#DIV/0!		367074 GDNF_367074 GDNF 40x End B3T_ch03_SV.tif	669	9078.57	13.57	0.329
		Middle			#DIV/0!					Middle	1698			96.4225	#DIV/0!		367074 GDNF_367074 GDNF 40x Entrance B3T_ch03_SV.tif	3732	42847.4	11.481	1.122			YFP (axon size μm2)	PCL	GDNF	GRAFT	SD (PCL)	SD (GDNF)	SD (Graft)
		Exit			#DIV/0!					Exit	669			37.9898	#DIV/0!		367074 GDNF_367074 GDNF 40x Middle B3T_ch03_SV.tif	1698	20629.6	12.149	0.642			Proximal	10.125	#DIV/0!	#DIV/0!	3.57841	#DIV/0!	#DIV/0!
		Distal			#DIV/0!					Distal	709			40.2612	#DIV/0!		367074 GDNF_367074 GDNF 40x Proximal B3T_ch03_SV.tif	570	5760.24	10.106	1.483			Entrance	11.3065	#DIV/0!	#DIV/0!	0.311834	#DIV/0!	#DIV/0!
																								Middle	18.873	#DIV/0!	#DIV/0!	0.147078	#DIV/0!	#DIV/0!
GDNF	367078	Proximal			#DIV/0!			GDNF	367078	Proximal	1379			100	#DIV/0!		cropped 367078 GDNF_367078 GDNF 40x Distal B3t_ch03_SV.tif	1502	13525	9.005	3.286			End	21.047	#DIV/0!	#DIV/0!	#DIV/0!	#DIV/0!	#DIV/0!
		Entrance			#DIV/0!					Entrance	1656			120.087	#DIV/0!		367078 GDNF_367078 GDNF 40x End B3t_ch03_SV.tif	897	15800.4	17.615	0.569			Distal	9.6375	#DIV/0!	#DIV/0!	0.348604	#DIV/0!	#DIV/0!
		Middle			#DIV/0!					Middle	1338			97.0268	#DIV/0!		367078 GDNF_367078 GDNF 40x Entrance B3t_ch03_SV.tif	1656	11422	6.897	1.332
		Exit			#DIV/0!					Exit	897			65.0471	#DIV/0!		367078 GDNF_367078 GDNF 40x Middle B3t_ch03_SV.tif	1338	27259.8	20.374	0.823
		Distal			#DIV/0!					Distal	1502			108.92	#DIV/0!		367078 GDNF_367078 GDNF 40x Proximal B3t_ch03_SV.tif	1379	18613.2	13.498	2.148
GDNF	367073	Proximal			#DIV/0!			GDNF	367073	Proximal	1237			100	#DIV/0!		367073 GDNF_367073 GDNF 40x Distal B3t_ch03_SV.tif	695	4485.26	6.454	0.398
		Entrance			#DIV/0!					Entrance	2900			234.438	#DIV/0!		367073 GDNF_367073 GDNF 40x End B3t_ch03_SV.tif	518	7546.06	14.568	0.273
		Middle			#DIV/0!					Middle	1526			123.363	#DIV/0!		367073 GDNF_367073 GDNF 40x Entrance B3t_ch03_SV.tif	2900	30036.4	10.357	0.932
		Exit			#DIV/0!					Exit	518			41.8755	#DIV/0!		367073 GDNF_367073 GDNF 40x Middle B3t_ch03_SV.tif	1526	19534.7	12.801	0.607
		Distal			#DIV/0!					Distal	695			56.1843	#DIV/0!		367073 GDNF_367073 GDNF 40x Prox B3t_ch03_SV.tif	1237	18537.8	14.986	3.211
GDNF	367080	Proximal			#DIV/0!			GDNF	367080	Proximal	2192			100	#DIV/0!		367080 GDNF_367080 GDNF 40x End B3t_ch03_SV.tif	526	5500.58	10.457	0.143
		Entrance			#DIV/0!					Entrance	3243			147.947	#DIV/0!		367080 GDNF_367080 GDNF 40x Entrance B3t_ch03_SV.tif	3243	37352.7	11.518	1.351
		Middle			#DIV/0!					Middle	923			42.1077	#DIV/0!		367080 GDNF_367080 GDNF 40x Middle B3t_ch03_SV.tif	923	17386.2	18.837	0.449
		Exit			#DIV/0!					Exit	526			23.9964	#DIV/0!		367080 GDNF_367080 GDNF 40x Prox B3t_ch03_SV.tif	2192	26341	12.017	1.765
		Distal			#DIV/0!					Distal	300			13.6861	#DIV/0!		cropped 367080 GDNF_367080 GDNF 40x Distal B3t_ch03_SV.tif	300	879.511	2.932	0.369
Graft	359731	Proximal			#DIV/0!			Graft	359731	Proximal	1819			100	#DIV/0!		359731 Graft_359731 Graft 40x Distal B3T_ch03_SV.tif	2011	21128.2	10.506	2.451
		Entrance			#DIV/0!					Entrance	2374			130.511	#DIV/0!		359731 Graft_359731 Graft 40x End B3T_ch03_SV.tif	1865	20712	11.106	2.406
		Middle			#DIV/0!					Middle	3368			185.157	#DIV/0!		359731 Graft_359731 Graft 40x Entrance B3T_ch03_SV.tif	2374	24376.4	10.268	1.618
		Exit			#DIV/0!					Exit	1865			102.529	#DIV/0!		359731 Graft_359731 Graft 40x Mid B3T_ch03_SV.tif	3368	32692.4	9.707	2.871
		Distal			#DIV/0!					Distal	2011			110.555	#DIV/0!		359731 Graft_359731 Graft 40x Proximal B3T_ch03_SV.tif	1819	11400.5	6.267	1.938
Graft	370887	Proximal			#DIV/0!			Graft	370887	Proximal	2539			100	#DIV/0!		370887 Graft_370887 Graft 40x Distal B3T_ch03_SV.tif	1825	17719.7	9.709	2.04
		Entrance			#DIV/0!					Entrance	2268			89.3265	#DIV/0!		370887 Graft_370887 Graft 40x End B3T_ch03_SV.tif	3376	32563.7	9.646	3.808
		Middle			#DIV/0!					Middle	3284			129.342	#DIV/0!		370887 Graft_370887 Graft 40x Entrance B3T_ch03_SV.tif	2268	16724.9	7.374	1.468
		Exit			#DIV/0!					Exit	3376			132.966	#DIV/0!		370887 Graft_370887 Graft 40x Mid B3T_ch03_SV.tif	3284	22807.1	6.945	2.012
		Distal			#DIV/0!					Distal	1825			71.8787	#DIV/0!		370887 Graft_370887 Graft 40x Proximal B3T_ch03_SV.tif	2539	22284.2	8.777	2.566
Graft	359732	Proximal			#DIV/0!			Graft	359732	Proximal	1515			100	#DIV/0!		359732 GRAFT_359732 Graft 40x Distal B3T_Processed001_ch03_SV.tif	2176	19323.2	8.88	3.316
		Entrance			#DIV/0!					Entrance	3858			254.653	#DIV/0!		359732 GRAFT_359732 Graft 40x End B3T_ch03_SV.tif	1230	9065.59	7.37	1.567
		Middle			#DIV/0!					Middle	1565			103.3	#DIV/0!		359732 GRAFT_359732 Graft 40x Entrance B3T_ch03_SV.tif	3858	48010.7	12.444	4.176
		Exit			#DIV/0!					Exit	1230			81.1881	#DIV/0!		359732 GRAFT_359732 Graft 40x Mid B3T_Processed001_ch03_SV.tif	1565	7954.16	5.083	2.023
		Distal			#DIV/0!					Distal	2176			143.63	#DIV/0!		359732 GRAFT_359732 Graft 40x Proximal B3T_ch03_SV.tif	1515	7078.88	4.673	1.21
Graft	366516	Proximal			#DIV/0!			Graft	366516	Proximal	2753			100	#DIV/0!		366516 GRAFT_366516 Graft 40x Distal B3T_ch03_SV.tif	1026	14025.2	13.67	2.373
		Entrance			#DIV/0!					Entrance	604			21.9397	#DIV/0!		366516 GRAFT_366516 Graft 40x End B3T_ch03_SV.tif	2152	28242.7	13.124	2.024
		Middle			#DIV/0!					Middle	3756			136.433	#DIV/0!		366516 GRAFT_366516 Graft 40x Entrance B3T_ch03_SV.tif	604	7720.63	12.783	1.968
		Exit			#DIV/0!					Exit	2152			78.1693	#DIV/0!		366516 GRAFT_366516 Graft 40x Mid B3T_ch03_SV.tif	3756	49864.5	13.276	3.344
		Distal			#DIV/0!					Distal	1026			37.2684	#DIV/0!		366516 GRAFT_366516 Graft 40x Proximal B3T_ch03_SV.tif	2753	26107.4	9.483	4.476
Graft	367065	Proximal			#DIV/0!			Graft	367065	Proximal	1282			100	#DIV/0!		367065 GRAFT_367065 Graft 40x Distal B3T_Processed001_ch03_SV.tif	1801	7527.77	4.18	1.299
		Entrance			#DIV/0!					Entrance	3177			247.816	#DIV/0!		367065 GRAFT_367065 Graft 40x End B3T_ch03_SV.tif	2734	28133.4	10.29	2.494
		Middle			#DIV/0!					Middle	2814			219.501	#DIV/0!		367065 GRAFT_367065 Graft 40x Entrance B3T_ch03_SV.tif	3177	31855.4	10.027	2.148
		Exit			#DIV/0!					Exit	2734			213.261	#DIV/0!		367065 GRAFT_367065 Graft 40x Mid B3T_ch03_SV.tif	2814	17654.9	6.274	2.035
		Distal			#DIV/0!					Distal	1801			140.484	#DIV/0!		367065 GRAFT_367065 Graft 40x Proximal B3T_ch03_SV.tif	1282	13122.4	10.236	3.31
Graft	368667	Proximal			#DIV/0!			Graft	368667	Proximal	1666			100	#DIV/0!		368667 GRAFT_368667 Graft 40x Distal B3T_ch03_SV.tif	1684	16067.3	9.541	2.093
		Entrance			#DIV/0!					Entrance	4630			277.911	#DIV/0!		368667 GRAFT_368667 Graft 40x End B3T_ch03_SV.tif	1100	12418.5	11.29	2.11
		Middle			#DIV/0!					Middle	3137			188.295	#DIV/0!		368667 GRAFT_368667 Graft 40x Entrance B3T_ch03_SV.tif	4630	48595.2	10.496	2.655
		Exit			#DIV/0!					Exit	1100			66.0264	#DIV/0!		368667 GRAFT_368667 Graft 40x Mid B3T_ch03_SV.tif	3137	27196.3	8.67	3.547
		Distal			#DIV/0!					Distal	1684			101.08	#DIV/0!		368667 GRAFT_368667 Graft 40x Proximal B3T_ch03_SV.tif	1666	9391.18	5.637	1.628
										Average	1882.94	20564.9	10.125
