# Supplementary material for: Evaluation of a GDNF-eluting nanofibrous PCL conduit in a mouse model of peripheral nerve injury
Source: RSC Adv. 2026 May 5;16(25):23177–89. doi: 10.1039/d6ra03291e (PMC13141687; doi:10.1039/d6ra03291e)
Supplement: RA-016-D6RA03291E-s004 [file RA-016-D6RA03291E-s004.xlsx]

## Sheet: Sheet1
Schwann cells
	Mouse ID	Region	ROI Area µm²	Fluorescent area µm²	% Fluorescent area+D3:F3
PCL	366515	Proximal
		Entrance
		Middle
		Exit								--- S100B 361273 PCL_S100B 361273 PCL 40x Proximal_ch02_SV.tif ---	--- S100B 362903 PCL_S100B 362903 PCL 40x Proximal_ch02_SV.tif ---						--- S100B 363491 PCL_S100B 363491 PCL 40x Proximal_ch02_SV.tif ---	--- S100B 363492 PCL_S100B 363492 PCL 40x Proximal_ch03_SV.tif ---						--- S100B 363493 PCL_S100B 363493 PCL 40x Proximal_ch03_SV.tif ---						--- S100B 364545 PCL_S100B 364545 PCL 40x Proximal_ch02_SV.tif ---
		Distal						3709.86	52.4996	ROI area: 7066.4612 µm²	ROI area: 8048.994 µm²						ROI area: 3796.1597 µm²	ROI area: 8850.4639 µm²						ROI area: 4581.2722 µm²						ROI area: 2194.5983 µm²
								11187	27.0271	Fluorescent area: 3709.8637 µm²	Fluorescent area: 4658.7023 µm²						Fluorescent area: 1756.4656 µm²	Fluorescent area: 4947.6174 µm²						Fluorescent area: 2093.7519 µm²						Fluorescent area: 1113.4078 µm²
PCL	363491	Proximal	3796.16	1756.47	46.2695					% Fluorescent area: 52.4996 %	% Fluorescent area: 57.8793 %						% Fluorescent area: 46.2695 %	% Fluorescent area: 55.9024 %						% Fluorescent area: 45.7024 %						% Fluorescent area: 50.734 %
		Entrance	27661.2	7069.06	25.5558					--- S100B 361273 PCL_S100B 361273 PCL 40x Entrance_ch02_SV.tif ---	--- S100B 362903 PCL_S100B 362903 PCL 40x Entrance_ch02_SV.tif ---						--- S100B 363491 PCL_S100B 363491 PCL 40x Entrance_ch02_SV.tif ---	--- S100B 363492 PCL_S100B 363492 PCL 40x Entrance_ch03_SV.tif ---						--- S100B 363493 PCL_S100B 363493 PCL 40x Entrance_ch02_SV.tif ---						--- S100B 364545 PCL_S100B 364545 PCL 40x Entrance_ch02_SV.tif ---
		Middle	36320.3	1531.72	4.2173					ROI area: 41391.8364 µm²	ROI area: 35397.1945 µm²						ROI area: 27661.2359 µm²	ROI area: 30448.5734 µm²						ROI area: 43189.5025 µm²						ROI area: 44381.3869 µm²
		Exit	28754.8	414.094	1.4401					Fluorescent area: 11187.0134 µm²	Fluorescent area: 5762.5549 µm²						Fluorescent area: 7069.063 µm²	Fluorescent area: 7788.1774 µm²						Fluorescent area: 7862.3982 µm²						Fluorescent area: 4043.7687 µm²
		Distal	2404.95	472.058	19.6286					% Fluorescent area: 27.0271 %	% Fluorescent area: 16.2797 %						% Fluorescent area: 25.5558 %	% Fluorescent area: 25.5781 %						% Fluorescent area: 18.2044 %						% Fluorescent area: 9.1114 %
										--- S100B 361273 PCL_S100B 361273 PCL 40x Middle_ch02_SV.tif ---	--- S100B 362903 PCL_S100B 362903 PCL 40x Middle_ch02_SV.tif ---						--- S100B 363491 PCL_S100B 363491 PCL 40x Middle_ch02_SV.tif ---	--- S100B 363492 PCL_S100B 363492 PCL 40x Mid_ch03_SV.tif ---						--- S100B 363493 PCL_S100B 363493 PCL 40x Middle_ch02_SV.tif ---						--- S100B 364545 PCL_S100B 364545 PCL 40x Middle_ch02_SV.tif ---
PCL	362903	Proximal	8048.99	4658.7	57.8793					ROI area: 45474.3939 µm²	ROI area: 33880.9813 µm²						ROI area: 36320.2995 µm²	ROI area: 25964.0212 µm²						ROI area: 47824.771 µm²						ROI area: 50195.7278 µm²
		Entrance	35397.2	5762.55	16.2797					Fluorescent area: 4895.2064 µm²	Fluorescent area: 1088.9569 µm²						Fluorescent area: 1531.7228 µm²	Fluorescent area: 2709.3656 µm²						Fluorescent area: 4974.4422 µm²						Fluorescent area: 3330.7681 µm²
		Middle	33881	1088.96	3.2141					% Fluorescent area: 10.7648 %	% Fluorescent area: 3.2141 %						% Fluorescent area: 4.2173 %	% Fluorescent area: 10.4351 %						% Fluorescent area: 10.4014 %						% Fluorescent area: 6.6356 %
		Exit	36803.1	1125.44	3.058					--- S100B 361273 PCL_S100B 361273 PCL 40x End_ch02_SV.tif ---	--- S100B 362903 PCL_S100B 362903 PCL 40x End_ch02_SV.tif ---						--- S100B 363491 PCL_S100B 363491 PCL 40x End_ch02_SV.tif ---	--- S100B 363492 PCL_S100B 363492 PCL 40x End_ch03_SV.tif ---						--- S100B 363493 PCL_S100B 363493 PCL 40x End_ch02_SV.tif ---						--- S100B 364545 PCL_S100B 364545 PCL 40x End_ch02_SV.tif ---
		Distal	7858.46	875.269	11.1379					ROI area: 49551.7758 µm²	ROI area: 36803.058 µm²						ROI area: 28754.7602 µm²	ROI area: 16251.446 µm²						ROI area: 31977.4322 µm²						ROI area: 46215.2938 µm²
										Fluorescent area: 1601.2335 µm²	Fluorescent area: 1125.4361 µm²						Fluorescent area: 414.0935 µm²	Fluorescent area: 1748.3051 µm²						Fluorescent area: 1740.0152 µm²						Fluorescent area: 1509.8863 µm²
PCL	363493	Proximal	4581.27	2093.75	45.7024					% Fluorescent area: 3.2314 %	% Fluorescent area: 3.058 %						% Fluorescent area: 1.4401 %	% Fluorescent area: 10.7578 %						% Fluorescent area: 5.4414 %						% Fluorescent area: 3.2671 %
		Entrance	43189.5	7862.4	18.2044					--- S100B 361273 PCL_S100B 361273 PCL 40x Distal_ch02_SV.tif ---	--- S100B 362903 PCL_S100B 362903 PCL 40x Distal_ch02_SV.tif ---						--- S100B 363491 PCL_S100B 363491 PCL 40x Distal_ch02_SV.tif ---	--- S100B 363492 PCL_S100B 363492 PCL 40x Distal_ch03_SV.tif ---						--- S100B 363493 PCL_S100B 363493 PCL 40x Distal_ch02_SV.tif ---						--- S100B 364545 PCL_S100B 364545 PCL 40x Distal_ch02_SV.tif ---
		Middle	47824.8	4974.44	10.4014					ROI area: 13812.5807 µm²	ROI area: 7858.4634 µm²						ROI area: 2404.9508 µm²	ROI area: 20117.1542 µm²						ROI area: 5329.9747 µm²						ROI area: 2408.5061 µm²
		Exit	31977.4	1740.02	5.4414					Fluorescent area: 854.3772 µm²	Fluorescent area: 875.2693 µm²						Fluorescent area: 472.0576 µm²	Fluorescent area: 4848.0544 µm²						Fluorescent area: 1117.2657 µm²						Fluorescent area: 917.7497 µm²
		Distal	5329.97	1117.27	20.9619					% Fluorescent area: 6.1855 %	% Fluorescent area: 11.1379 %						% Fluorescent area: 19.6286 %	% Fluorescent area: 24.0991 %						% Fluorescent area: 20.9619 %						% Fluorescent area: 38.1045 %
PCL	364545	Proximal	2194.6	1113.41	50.734
		Entrance	44381.4	4043.77	9.1114
		Middle	50195.7	3330.77	6.6356
		Exit	46215.3	1509.89	3.2671
		Distal	2408.51	917.75	38.1045
PCL	363492	Proximal	8850.46	4947.62	55.9024
		Entrance	30448.6	7788.18	25.5781
		Middle	25964	2709.37	10.4351
		Exit	16251.4	1748.31	10.7578
		Distal	20117.2	4848.05	24.0991
GDNF	361273	Proximal	7066.46	3709.86	52.4996
		Entrance	41391.8	11187	27.0271
		Middle	45474.4	4895.21	10.7648
		Exit	49551.8	1601.23	3.2314
		Distal	13812.6	854.377	6.1855
GDNF	367077	Proximal	4207.04	2228.32	52.9664					S100B 367077 GDNF_S100B 367077 GDNF 40x Distal_ch02_SV.tif	24408	6680.88	0.274	48.758	254.51		--- S100B 367077 GDNF_S100B 367077 GDNF 40x Proximal_ch02_SV.tif ---	--- S100B 367073 GDNF_S100B 367073 GDNF 40x Proximal_ch03_SV.tif ---						--- S100B 367074 GDNF_S100B 367074 GDNF 40x Proximal_ch02_SV.tif ---						--- S100B 367078 GDNF_S100B 367078 GDNF 40x Proximal_ch02_SV.tif ---						--- S100B 367080 GDNF_S100B 367080 GDNF 40x Proximal_ch03_SV.tif ---
		Entrance	69336.6	46040.9	66.402					S100B 367077 GDNF_S100B 367077 GDNF 40x End_ch02_SV.tif	74911	4078.68	0.054	12.313	254.381		ROI area: 4207.0398 µm²	ROI area: 7783.3659 µm²						ROI area: 3175.8792 µm²						ROI area: 7859.435 µm²						ROI area: 8337.1157 µm²
		Middle	52547.4	14607.6	27.7989					S100B 367077 GDNF_S100B 367077 GDNF 40x Entrance_ch02_SV.tif	37737	16068.9	0.426	37.436	254.567		Fluorescent area: 2228.3177 µm²	Fluorescent area: 2161.5409 µm²						Fluorescent area: 1673.1986 µm²						Fluorescent area: 5500.6129 µm²						Fluorescent area: 7277.4757 µm²
		Exit	60278.6	13076	21.6926					S100B 367077 GDNF_S100B 367077 GDNF 40x Middle_ch02_SV.tif	75519	4748.76	0.063	20.016	254.33		% Fluorescent area: 52.9664 %	% Fluorescent area: 27.7713 %						% Fluorescent area: 52.6846 %						% Fluorescent area: 69.9874 %						% Fluorescent area: 87.2901 %
		Distal	12211.6	5103.19	41.7896					S100B 367077 GDNF_S100B 367077 GDNF 40x Proximal_ch02_SV.tif	4397	809.439	0.184	27.96	254.27		--- S100B 367077 GDNF_S100B 367077 GDNF 40x Middle_ch02_SV.tif ---	--- S100B 367073 GDNF_S100B 367080 GDNF 40x Entrance_ch03_SV.tif ---						--- S100B 367074 GDNF_S100B 367077 GDNF 40x Entrance_ch02_SV.tif ---						--- S100B 367078 GDNF_S100B 367078 GDNF 40x Entrance_ch02_SV.tif ---						--- S100B 367080 GDNF_S100B 367080 GDNF 40x Entrance_ch03_SV.tif ---
																	ROI area: 52547.4414 µm²	ROI area: 49811.0538 µm²						ROI area: 74562.9424 µm²						ROI area: 31491.3309 µm²						ROI area: 43855.1917 µm²
GDNF	367074	Proximal	3175.88	1673.2	52.6846					S100B 367074 GDNF_S100B 367074 GDNF 40x Proximal_ch02_SV.tif	7720	548.581	0.071	18.645	254.247		Fluorescent area: 14607.5929 µm²	Fluorescent area: 5626.0038 µm²						Fluorescent area: 20539.5753 µm²						Fluorescent area: 14782.3233 µm²						Fluorescent area: 11252.0937 µm²
		Entrance	74562.9	20539.6	27.5466					S100B 367074 GDNF_S100B 367077 GDNF 40x Distal_ch02_SV.tif	19578	451.372	0.023	4.11	254.34		% Fluorescent area: 27.7989 %	% Fluorescent area: 11.2947 %						% Fluorescent area: 27.5466 %						% Fluorescent area: 46.9409 %						% Fluorescent area: 25.6574 %
		Middle	44768.5	5578.51	12.4608					S100B 367074 GDNF_S100B 367077 GDNF 40x End_ch02_SV.tif	261741	1856.13	0.007	9.086	254.482		--- S100B 367077 GDNF_S100B 367077 GDNF 40x Entrance_ch02_SV.tif ---	--- S100B 367073 GDNF_S100B 367080 GDNF 40x Middle_ch03_SV.tif ---						--- S100B 367074 GDNF_S100B 367077 GDNF 40x Middle_ch02_SV.tif ---						--- S100B 367078 GDNF_S100B 367078 GDNF 40x Middle_ch02_SV.tif ---						--- S100B 367080 GDNF_S100B 367080 GDNF 40x Middle_ch03_SV.tif ---
		Exit	49421.3	5000.9	10.1189					S100B 367074 GDNF_S100B 367077 GDNF 40x Entrance_ch02_SV.tif	148359	6687.95	0.045	17.733	254.516		ROI area: 69336.6152 µm²	ROI area: 56886.5759 µm²						ROI area: 44768.5298 µm²						ROI area: 34347.7206 µm²						ROI area: 44610.8049 µm²
		Distal	5199.89	3202.56	61.589					S100B 367074 GDNF_S100B 367077 GDNF 40x Middle_ch02_SV.tif	72262	1986.98	0.027	8.108	254.36		Fluorescent area: 46040.8787 µm²	Fluorescent area: 3824.4238 µm²						Fluorescent area: 5578.5141 µm²						Fluorescent area: 2193.7602 µm²						Fluorescent area: 1831.8378 µm²
																	% Fluorescent area: 66.402 %	% Fluorescent area: 6.7229 %						% Fluorescent area: 12.4608 %						% Fluorescent area: 6.3869 %						% Fluorescent area: 4.1063 %
GDNF	367078	Proximal	7859.44	5500.61	69.9874												--- S100B 367077 GDNF_S100B 367077 GDNF 40x End_ch02_SV.tif ---	--- S100B 367073 GDNF_S100B 367080 GDNF 40x End_ch03_SV.tif ---						--- S100B 367074 GDNF_S100B 367077 GDNF 40x End_ch02_SV.tif ---						--- S100B 367078 GDNF_S100B 367078 GDNF 40x End_ch02_SV.tif ---						--- S100B 367080 GDNF_S100B 367080 GDNF 40x End_ch03_SV.tif ---
		Entrance	31491.3	14782.3	46.9409					S100B 367078 GDNF_S100B 367078 GDNF 40x Distal_ch02_SV.tif	30464	1918.21	0.063	66.831	254.443		ROI area: 60278.5838 µm²	ROI area: 48681.7109 µm²						ROI area: 49421.2965 µm²						ROI area: 52425.5967 µm²						ROI area: 45720.8964 µm²
		Middle	34347.7	2193.76	6.3869					S100B 367078 GDNF_S100B 367078 GDNF 40x End_ch02_SV.tif	25824	603.265	0.023	2.465	254.368		Fluorescent area: 13076.0114 µm²	Fluorescent area: 883.2019 µm²						Fluorescent area: 5000.9014 µm²						Fluorescent area: 1991.4123 µm²						Fluorescent area: 2800.6269 µm²
		Exit	52425.6	1991.41	3.7985					S100B 367078 GDNF_S100B 367078 GDNF 40x Entrance_ch02_SV.tif	110995	5624.35	0.051	33.015	254.49		% Fluorescent area: 21.6926 %	% Fluorescent area: 1.8142 %						% Fluorescent area: 10.1189 %						% Fluorescent area: 3.7985 %						% Fluorescent area: 6.1255 %
		Distal	3643.01	2135.04	58.6063					S100B 367078 GDNF_S100B 367078 GDNF 40x Middle_ch02_SV.tif	17011	1056.07	0.062	4.352	254.497		--- S100B 367077 GDNF_S100B 367077 GDNF 40x Distal_ch02_SV.tif ---	--- S100B 367073 GDNF_S100B 367080 GDNF 40x Distal_ch03_SV.tif ---						--- S100B 367074 GDNF_S100B 367077 GDNF 40x Distal_ch02_SV.tif ---						--- S100B 367078 GDNF_S100B 367078 GDNF 40x Distal_ch02_SV.tif ---						--- S100B 367080 GDNF_S100B 367080 GDNF 40x Distal_ch03_SV.tif ---
										S100B 367078 GDNF_S100B 367078 GDNF 40x Proximal_ch02_SV.tif	20378	2903.15	0.142	45.726	254.476		ROI area: 12211.6485 µm²	ROI area: 11575.9563 µm²						ROI area: 5199.8925 µm²						ROI area: 3643.0142 µm²						ROI area: 3310.1088 µm²
GDNF	367073	Proximal	7783.37	2161.54	27.7713												Fluorescent area: 7103.1941 µm²	Fluorescent area: 2022.251 µm²						Fluorescent area: 3202.56 µm²						Fluorescent area: 2135.0363 µm²						Fluorescent area: 505.1234 µm²
		Entrance	49811.1	5626	11.2947					S100B 367073 GDNF_S100B 367080 GDNF 40x Distal_ch03_SV.tif	3833	142.624	0.037	0.837	254.066		% Fluorescent area: 58.1674 %	% Fluorescent area: 17.4694 %						% Fluorescent area: 61.589 %						% Fluorescent area: 58.6063 %						% Fluorescent area: 15.26 %
		Middle	56886.6	3824.42	6.7229					S100B 367073 GDNF_S100B 367080 GDNF 40x End_ch03_SV.tif	21961	321.387	0.015	1.573	254.261
		Exit	48681.7	883.202	1.8142					S100B 367073 GDNF_S100B 367080 GDNF 40x Entrance_ch03_SV.tif	15315	1632.83	0.107	6.872	254.207
		Distal	11576	2022.25	17.4694					S100B 367073 GDNF_S100B 367080 GDNF 40x Middle_ch03_SV.tif	19960	1102.41	0.055	4.619	254.284
GDNF	367080	Proximal	8337.12	7277.48	87.2901					S100B 367080 GDNF_S100B 367080 GDNF 40x Distal_ch03_SV.tif	19808	903.943	0.046	10.728	254.179
		Entrance	43855.2	11252.1	25.6574					S100B 367080 GDNF_S100B 367080 GDNF 40x End_ch03_SV.tif	44191	994.598	0.023	4.212	254.27
		Middle	44610.8	1831.84	4.1063					S100B 367080 GDNF_S100B 367080 GDNF 40x Entrance_ch03_SV.tif	28996	3509.09	0.121	17.138	254.32
		Exit	45720.9	2800.63	6.1255					S100B 367080 GDNF_S100B 367080 GDNF 40x Middle_ch03_SV.tif	9885	542.755	0.055	2.655	254.078
		Distal	3310.11	505.123	15.26					S100B 367080 GDNF_S100B 367080 GDNF 40x Proximal_ch03_SV.tif	21154	5460.55	0.258	49.444	254.516
Graft	359731	Proximal	4753.55	2689.42	56.577					--- S100B 359731 GRAFT_S100B 359731 GRAFT 40x Proximal_ch02_SV.tif ---	--- S100B 359732 GRAFT_S100B 359732 GRAFT 40x Proximal_ch02_SV.tif ---						--- S100B 366516 GRAFT_S100B 366516 GRAFT 40x Proximal_ch03_SV.tif ---	--- S100B 367065 GRAFT_S100B 367065 GRAFT 40x Proximal_ch02_SV.tif ---						--- S100B 368667 GRAFT_S100B 368667 GRAFT 40x Proximal_ch03_SV.tif ---						--- S100B 370887 GRAFT_S100B 370887 GRAFT 40x Proximal_ch02_SV.tif ---
		Entrance	22058.6	6036.64	27.3664					ROI area: 4753.5482 µm²	ROI area: 4597.3192 µm²						ROI area: 6977.4949 µm²	ROI area: 4380.4929 µm²						ROI area: 5130.5103 µm²						ROI area: 6363.5399 µm²
		Middle	16134.8	6539.07	40.5276					Fluorescent area: 2689.4158 µm²	Fluorescent area: 4114.2959 µm²						Fluorescent area: 5626.3757 µm²	Fluorescent area: 2744.277 µm²						Fluorescent area: 1255.5169 µm²						Fluorescent area: 1778.5069 µm²
		Exit	11059.2	2193.01	19.8297					% Fluorescent area: 56.577 %	% Fluorescent area: 89.4934 %						% Fluorescent area: 80.636 %	% Fluorescent area: 62.6477 %						% Fluorescent area: 24.4716 %						% Fluorescent area: 27.9484 %
		Distal	9021.26	1703.8	18.8865					--- S100B 359731 GRAFT_S100B 359731 GRAFT 40x Entrance_ch02_SV.tif ---	--- S100B 359732 GRAFT_S100B 359732 GRAFT 40x Entrance_ch02_SV.tif ---						--- S100B 366516 GRAFT_S100B 366516 GRAFT 40x Entrance_ch03_SV.tif ---	--- S100B 367065 GRAFT_S100B 367065 GRAFT 40x Entrance_ch02_SV.tif ---						--- S100B 368667 GRAFT_S100B 368667 GRAFT 40x Entrance_ch03_SV.tif ---						--- S100B 370887 GRAFT_S100B 370887 GRAFT 40x Entrance_ch02_SV.tif ---
										ROI area: 22058.5602 µm²	ROI area: 19513.1451 µm²						ROI area: 3825.343 µm²	ROI area: 13145.2282 µm²						ROI area: 14390.6192 µm²						ROI area: 9838.2549 µm²
Graft	370887	Proximal	6363.54	1778.51	27.9484					Fluorescent area: 6036.6399 µm²	Fluorescent area: 15908.6254 µm²						Fluorescent area: 1027.4871 µm²	Fluorescent area: 7855.4997 µm²						Fluorescent area: 1590.3747 µm²						Fluorescent area: 3196.9153 µm²
		Entrance	9838.25	3196.92	32.4947					% Fluorescent area: 27.3664 %	% Fluorescent area: 81.5277 %						% Fluorescent area: 26.86 %	% Fluorescent area: 59.7593 %						% Fluorescent area: 11.0515 %						% Fluorescent area: 32.4947 %
		Middle	19098.3	8237.09	43.1299					--- S100B 359731 GRAFT_S100B 359731 GRAFT 40x Middle_ch02_SV.tif ---	--- S100B 359732 GRAFT_S100B 359732 GRAFT 40x Middle_ch02_SV.tif ---						--- S100B 366516 GRAFT_S100B 366516 GRAFT 40x Middle_ch03_SV.tif ---	--- S100B 367065 GRAFT_S100B 367065 GRAFT 40x Middle_ch02_SV.tif ---						--- S100B 368667 GRAFT_S100B 368667 GRAFT 40x Middle_ch03_SV.tif ---						--- S100B 370887 GRAFT_S100B 370887 GRAFT 40x Middle_ch02_SV.tif ---
		Exit	13702.7	8360.52	61.0137					ROI area: 16134.8384 µm²	ROI area: 5523.7209 µm²						ROI area: 2787.9946 µm²	ROI area: 5733.6594 µm²						ROI area: 6099.7573 µm²						ROI area: 19098.3036 µm²
		Distal	7449.43	1890.92	25.3835					Fluorescent area: 6539.0686 µm²	Fluorescent area: 1130.3384 µm²						Fluorescent area: 1757.8274 µm²	Fluorescent area: 3211.1063 µm²						Fluorescent area: 1006.1777 µm²						Fluorescent area: 8237.0885 µm²
										% Fluorescent area: 40.5276 %	% Fluorescent area: 20.4634 %						% Fluorescent area: 63.0499 %	% Fluorescent area: 56.0045 %						% Fluorescent area: 16.4954 %						% Fluorescent area: 43.1299 %
Graft	359732	Proximal	4597.32	4114.3	89.4934					--- S100B 359731 GRAFT_S100B 359731 GRAFT 40x End_ch02_SV.tif ---	--- S100B 359732 GRAFT_S100B 359732 GRAFT 40x End_ch02_SV.tif ---						--- S100B 366516 GRAFT_S100B 366516 GRAFT 40x End_ch03_SV.tif ---	--- S100B 367065 GRAFT_S100B 367065 GRAFT 40x End_ch02_SV.tif ---						--- S100B 368667 GRAFT_S100B 368667 GRAFT 40x End_ch03_SV.tif ---						--- S100B 370887 GRAFT_S100B 370887 GRAFT 40x End_ch02_SV.tif ---
		Entrance	19513.1	15908.6	81.5277					ROI area: 11059.2247 µm²	ROI area: 6855.5571 µm²						ROI area: 7768.9154 µm²	ROI area: 3116.4845 µm²						ROI area: 5537.5338 µm²						ROI area: 13702.7048 µm²
		Middle	5523.72	1130.34	20.4634					Fluorescent area: 2193.0108 µm²	Fluorescent area: 2932.8405 µm²						Fluorescent area: 1307.1896 µm²	Fluorescent area: 1219.9195 µm²						Fluorescent area: 1227.8204 µm²						Fluorescent area: 8360.5243 µm²
		Exit	6855.56	2932.84	42.7805					% Fluorescent area: 19.8297 %	% Fluorescent area: 42.7805 %						% Fluorescent area: 16.8259 %	% Fluorescent area: 39.1441 %						% Fluorescent area: 22.1727 %						% Fluorescent area: 61.0137 %
		Distal	3401.21	980.083	28.8158					--- S100B 359731 GRAFT_S100B 359731 GRAFT 40x Distal_ch02_SV.tif ---	--- S100B 359732 GRAFT_S100B 359732 GRAFT 40x Distal_ch02_SV.tif ---						--- S100B 366516 GRAFT_S100B 366516 GRAFT 40x Distal_ch03_SV.tif ---	--- S100B 367065 GRAFT_S100B 367065 GRAFT 40x Distal_ch02_SV.tif ---						--- S100B 368667 GRAFT_S100B 368667 GRAFT 40x Distal_ch03_SV.tif ---						--- S100B 370887 GRAFT_S100B 370887 GRAFT 40x Distal_ch02_SV.tif ---
										ROI area: 9021.2594 µm²	ROI area: 3401.2058 µm²						ROI area: 3696.761 µm²	ROI area: 2349.3731 µm²						ROI area: 6071.4694 µm²						ROI area: 7449.428 µm²
Graft	366516	Proximal	6977.49	5626.38	80.636					Fluorescent area: 1703.8024 µm²	Fluorescent area: 980.0834 µm²						Fluorescent area: 671.61 µm²	Fluorescent area: 447.4288 µm²						Fluorescent area: 734.0123 µm²						Fluorescent area: 1890.9231 µm²
		Entrance	3825.34	1027.49	26.86					% Fluorescent area: 18.8865 %	% Fluorescent area: 28.8158 %						% Fluorescent area: 18.1675 %	% Fluorescent area: 19.0446 %						% Fluorescent area: 12.0895 %						% Fluorescent area: 25.3835 %
		Middle	2787.99	1757.83	63.0499
		Exit	7768.92	1307.19	16.8259
		Distal	3696.76	671.61	18.1675
Graft	367065	Proximal	4380.49	2744.28	62.6477
		Entrance	13145.2	7855.5	59.7593
		Middle	5733.66	3211.11	56.0045
		Exit	3116.48	1219.92	39.1441
		Distal	2349.37	447.429	19.0446
Graft	368667	Proximal	5130.51	1255.52	24.4716
		Entrance	14390.6	1590.37	11.0515
		Middle	6099.76	1006.18	16.4954
		Exit	5537.53	1227.82	22.1727
		Distal	6071.47	734.012	12.0895
			Averages			SD
			ROI Area µm²	Fluorescent area µm²	% Fluorescent area	ROI Area µm²	Fluorescent area µm²	% Fluorescent area
	PCL	Proximal	5494.3	2913.99	51.2975	2845.86	1763.12	5.50973
		Entrance	36215.6	6505.19	18.9459	7456.89	1613.7	6.92915
		Middle	38837.2	2727.05	6.9807	10079.8	1543.35	3.37553
		Exit	32000.4	1307.55	4.79288	10996.5	559.835	3.6256
		Distal	7623.81	1646.08	22.7864	7345.68	1805.22	9.81524
	GDNF	Proximal	6404.88	3758.5	57.1999	2165.37	2220.84	19.9769
		Entrance	51741.5	18238	34.1448	16813.8	14476.3	19.4557
		Middle	46439.2	5488.56	11.3734	7742.44	4701.35	8.60991
		Exit	51013.3	4225.56	7.79685	5019.09	4560.96	7.40134
		Distal	8292.2	2303.76	33.4833	4745.91	1678.58	23.7647
	GRAFT	Proximal	5414.48	3034.73	56.9623	1174.46	1502.55	23.8844
		Entrance	13676.1	5935.92	39.8433	7355.02	5722.06	24.2213
		Middle	9855.7	3646.93	39.9451	7255.39	3087.52	16.369
		Exit	8500.58	2873.55	33.6278	4057.05	2967.31	18.1014
		Distal	5183.61	1071.31	20.3979	2884.53	633.713	4.76974
